# Supplementary material for: Rechargeable Li/CO2–O2 (2 : 1) battery and Li/CO2 battery
Source: Royal Society of Chemistry journal article supplement (doi:10.1039/c3ee43318h), 2013-11-11
Supplement: c3ee43318h.pdf [file c3ee43318h.pdf]

# Supplementary Information for Rechargeable Li/CO<sub>2</sub>:O<sub>2</sub> (2:1) battery and Li/CO<sub>2</sub> battery

Yali Liu, Rui Wang, Yingchun Lyu, Hong Li\*, Liquan Chen

Beijing National Laboratory for Condensed Mater Physics, Institute of Physics, Chinese Academy of Sciences,  
Beijing, 100190, P.R. China.

Fax: +86 10 82649046; Tel: +86 01 82649067; E-mail: hli@iphy.ac.cn

## Supplementary Tables

|                 | Carbon (atomic %) | Oxygen (atomic %) | Fluorine (atomic %) |
|-----------------|-------------------|-------------------|---------------------|
| Pristine        | 94.82             | 1.85              | 3.19                |
| First discharge | 45.60             | 45.19             | 8.19                |
| First charge    | 92.48             | 5.23              | 2.09                |
| Fifth discharge | 40.75             | 52.26             | 6.99                |
| Fifth charge    | 88.78             | 6.84              | 4.38                |

**Supplementary Table S1** The C, O and F atomic percentage composition in the KB electrode in the pristine, in the first discharge, in the first charge, in the fifth discharge and in the fifth charge state of the Li/CO<sub>2</sub>:O<sub>2</sub> battery.

|                 | Carbon (atomic %) | Oxygen (atomic %) | Fluorine (atomic %) |
|-----------------|-------------------|-------------------|---------------------|
| Pristine        | 94.82             | 1.85              | 3.19                |
| First discharge | 45.47             | 52.86             | 7.11                |
| First charge    | 87.54             | 7.89              | 4.35                |
| Fifth discharge | 45.43             | 48.08             | 4.41                |
| Fifth charge    | 87.61             | 6.07              | 5.86                |

**Supplementary Table S2** The C, O and F atomic percentage composition in the KB electrode in the pristine, in the first discharge, in the first charge, in the fifth discharge and in the fifth charge state of the Li/CO<sub>2</sub> battery.

## Supplementary Figures

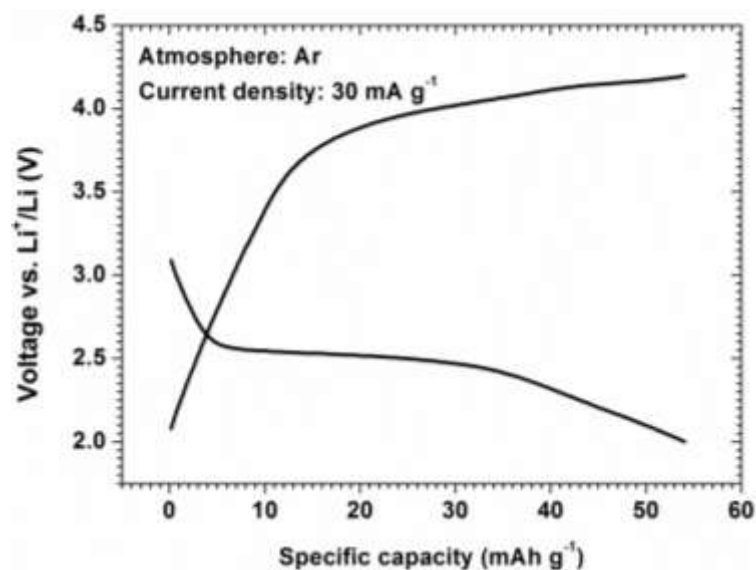

**Supplementary Fig. S1** Charge-discharge curves of lithium battery with Ar as working gas. The cut-off voltage of discharge is 2.0 V. The current density is 30 mA g<sup>-1</sup>. The cathode is KB and PTFE at a weight ratio of 90:10.

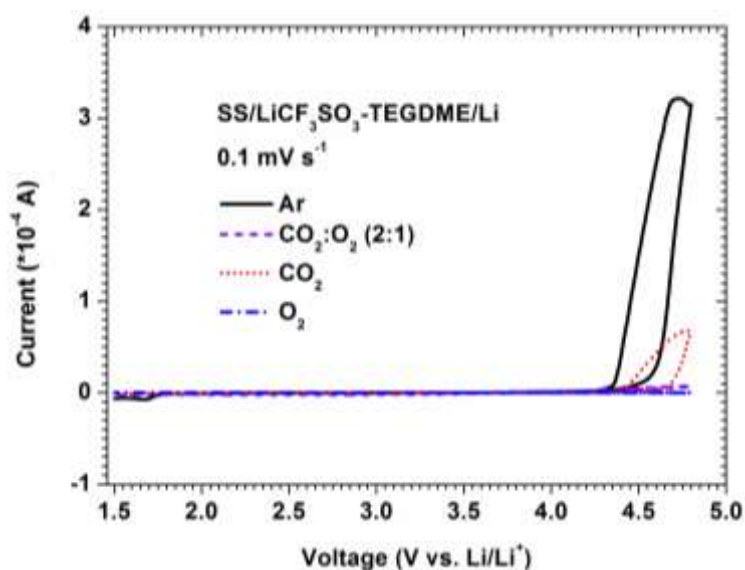

**Supplementary Fig. S2** The cyclic voltammetry curves of LiCF<sub>3</sub>SO<sub>3</sub> in TEGDME at a molar ratio of 1:4 under Ar (solid line), CO<sub>2</sub>:O<sub>2</sub> (2:1) mixture (dash line) and CO<sub>2</sub> (dot line). The working electrodes are all stainless steel. The counter and reference electrodes are lithium foil. The rate is 0.1 mV s<sup>-1</sup>.

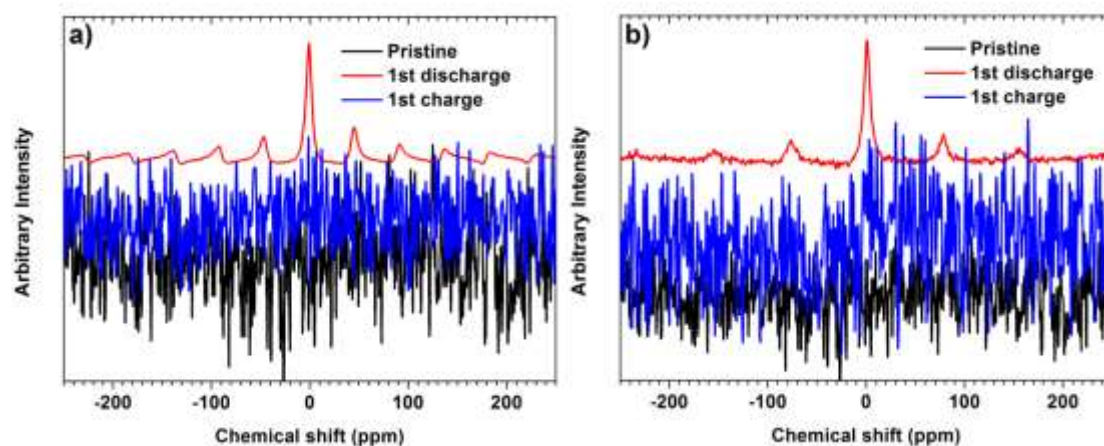

**Supplementary Fig. S3**  $^7\text{Li}$  NMR spectra of the KB electrode in the pristine, first discharge and first charge state in the a)  $\text{Li}/\text{CO}_2:\text{O}_2$  (2:1) battery and b)  $\text{Li}/\text{CO}_2$  battery. The rotate speed for the sample is 7000 Hz in a) and 12000 Hz in b).

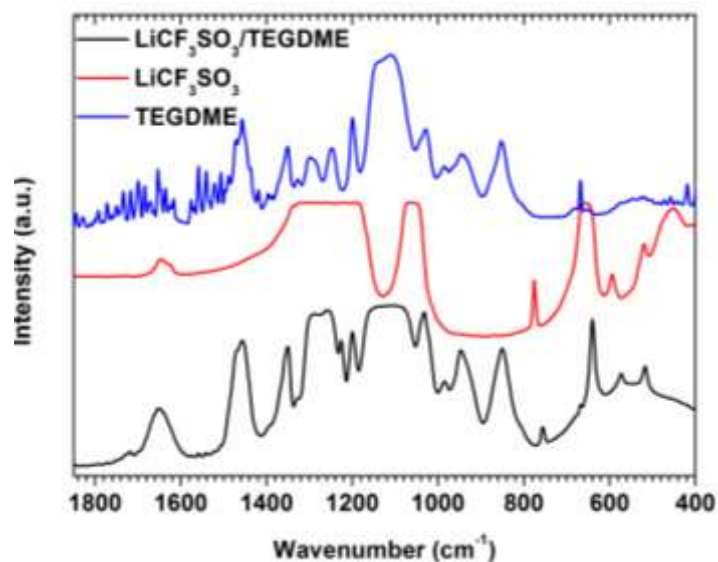

**Supplementary Fig. S4** The FTIR spectra of the  $\text{LiCF}_3\text{SO}_3/\text{TEGDME}$  (1:4, molar ratio) electrolyte (black),  $\text{LiCF}_3\text{SO}_3$  (red) and TEGDME (blue).

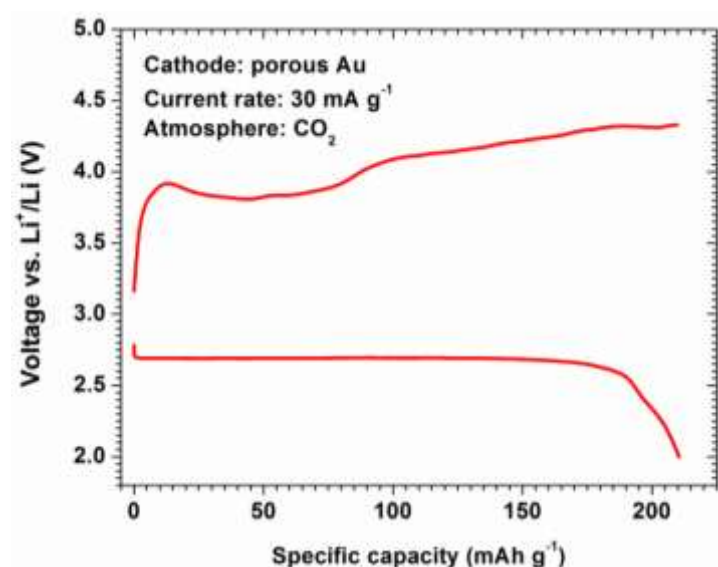

**Supplementary Fig. S5** Charge-discharge curves of Li/CO<sub>2</sub> battery with porous Au as cathode. The cut-off voltage of discharge is 2 V. The current density is 30 mA g<sup>-1</sup>.

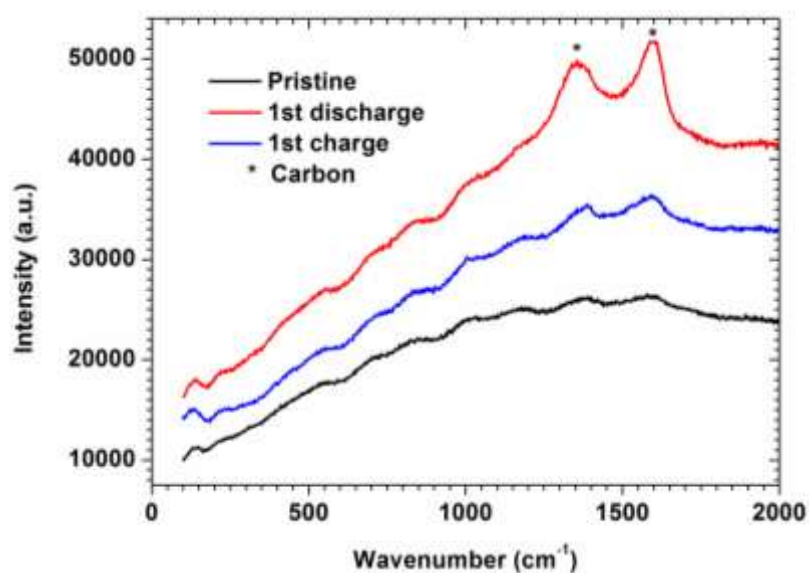

**Supplementary Fig. S6** Raman spectra of porous gold in the pristine (black), first discharge (red) and first charge state (blue) in Li/CO<sub>2</sub> battery.

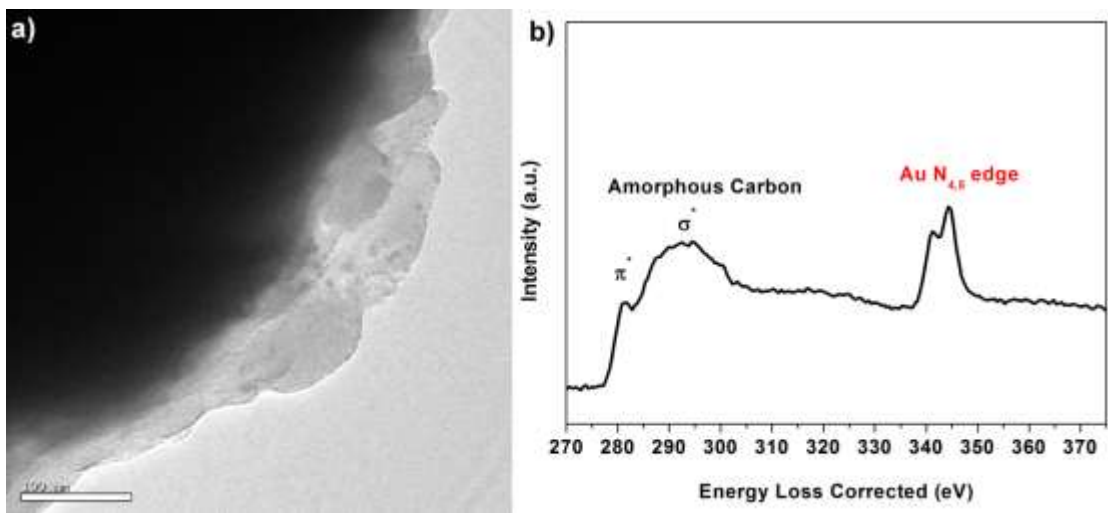

**Supplementary Fig. S7** The a) TEM and b) EELS of the porous gold electrode in the first discharge state in Li/CO<sub>2</sub> battery.
